# Supplementary material
Source: MDPI journal article supplement (https://www.mdpi.com/2071-1050/16/2/630)
Supplement: s1 [file s1]

## Supplementary Materials

Forest and agricultural soils areas evaluated by the Corine Land Cover (CLC) 2018.

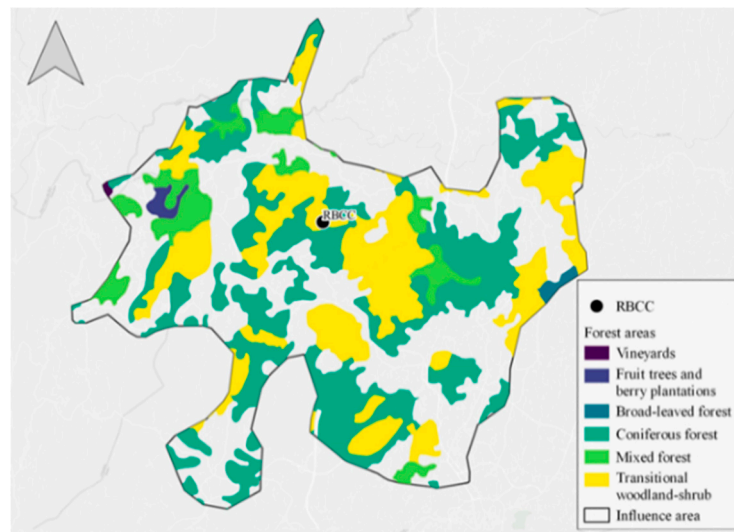

**Figure S1.** Flora characterization of the region under study (CLC 2018).

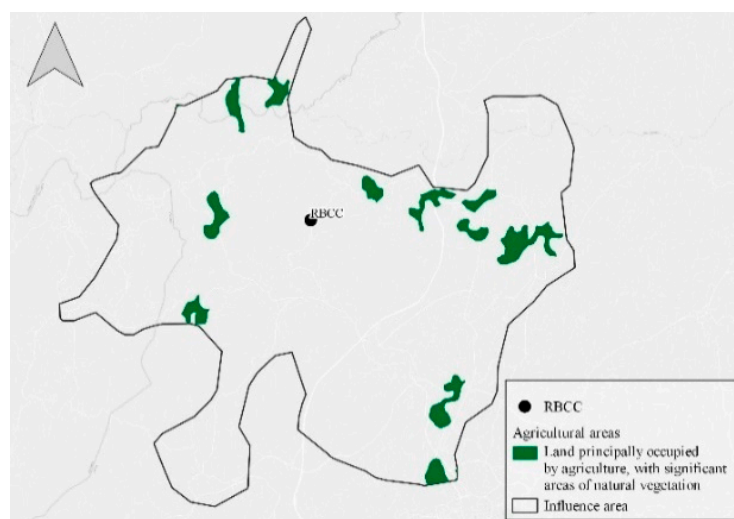

**Figure S2.** Region agricultural areas (CLC 2018).

**Table S1.** Assessment of the residual biomass productivity rate (P) [28]

| CLC                                                                                           | Description                                                                                                                                                                                                               | Selected species   | P<br>[ton/ha] |
|-----------------------------------------------------------------------------------------------|---------------------------------------------------------------------------------------------------------------------------------------------------------------------------------------------------------------------------|--------------------|---------------|
| <b>Broad-leaved forest</b>                                                                    | Vegetation formation composed principally of trees, including shrub and bush understorey, where broad-leaved species predominate                                                                                          | Cork oak           | 0.66          |
|                                                                                               |                                                                                                                                                                                                                           | Holm oak           |               |
|                                                                                               |                                                                                                                                                                                                                           | Oak                |               |
| <b>Coniferous forest</b>                                                                      | Vegetation formation composed principally of trees, including shrub and bush understorey, where coniferous species predominate                                                                                            | Pinus Pinaster     | 0.88          |
|                                                                                               |                                                                                                                                                                                                                           | Other conifers     |               |
| <b>Fruit trees and berry plantations</b>                                                      | Cultivated parcels planted with fruit trees and shrubs, intended for fruit production, including nuts. The planting pattern can be by single or mixed fruit species, both in association with permanently grassy surfaces | Fruit farm         | 2.00          |
| <b>Mixed forest</b>                                                                           | Vegetation formation composed principally of trees, including shrub and bush understorey, where neither broad-leaved nor coniferous species predominate                                                                   | Eucalyptus         | 0.68          |
|                                                                                               |                                                                                                                                                                                                                           | Cork oak           |               |
|                                                                                               |                                                                                                                                                                                                                           | Holm oak           |               |
|                                                                                               |                                                                                                                                                                                                                           | Oak                |               |
|                                                                                               |                                                                                                                                                                                                                           | Pinus Pinaster     |               |
|                                                                                               |                                                                                                                                                                                                                           | Other conifers     |               |
| <b>Transitional woodland-shrub</b>                                                            | Transitional bushy and herbaceous vegetation with occasional scattered trees.                                                                                                                                             | Herbaceous         | 0.31          |
| <b>Vineyards</b>                                                                              | Areas planted with vines, vineyard parcels covering >50% and determining the land use of the area.                                                                                                                        | Vineyard           | 7.00          |
| <b>Land principally occupied by agriculture, with significant areas of natural vegetation</b> | Areas principally occupied by agriculture, interspersed with significant natural or semi-natural areas (including forests, shrubs, wetlands, water bodies, mineral outcrops) in a mosaic pattern.                         | Fruit farm         | 2.69          |
|                                                                                               |                                                                                                                                                                                                                           | Cereal cultivation |               |
|                                                                                               |                                                                                                                                                                                                                           | Herbaceous         |               |
|                                                                                               |                                                                                                                                                                                                                           | Vineyard           |               |

**Table S2.** Equivalent processes and materials in SimaPro and characterisation of the LCIA results.

| Process                                         | Equivalent in SimaPro                                                                                                            |
|-------------------------------------------------|----------------------------------------------------------------------------------------------------------------------------------|
| Ashes (landfilling)                             | Wood ash mixture, pure {Europe without Switzerland}   treatment of wood ash mixture, pure, sanitary landfill   APOS, U           |
| Biomass shredding                               | Wood chipping, forwarder with terrain chipper, in forest {GLO}   market for   APOS, U                                            |
| Electricity, from country mix                   | Electricity, high voltage {PT}   electricity production, natural gas, combined cycle power plant   APOS, U                       |
| KCl                                             | Potassium chloride {RER}   potassium chloride production   APOS, U                                                               |
| Land use                                        | Occupation, urban, green areas                                                                                                   |
| Transportation of forest residual biomass       | Machine operation, diesel, $\geq 18.64$ kW and $< 74.57$ kW, steady-state GLO}   market for   APOS, U                            |
| Transportation of agricultural residual biomass |                                                                                                                                  |
| Transportation to fields                        |                                                                                                                                  |
| Transportation to Biomass Power Plant           | Transport, freight, lorry 16-32 metric ton, euro5 {RER}   market for transport, freight, lorry 16-32 metric ton, EURO5   APOS, U |
| TSP                                             | Triple superphosphate {RER}   triple superphosphate production   APOS, U                                                         |
| Urea                                            | Urea {RER}   urea production   APOS, U                                                                                           |
| Water (treatment)                               | Water, deionised {Europe without Switzerland}   water production, deionised   APOS, U                                            |
| Material                                        | Equivalent in SimaPro                                                                                                            |
| CH <sub>4</sub>                                 | Methane, biogenic                                                                                                                |
| CO                                              | Carbon monoxide, biogenic                                                                                                        |
| CO <sub>2</sub>                                 | Carbon dioxide, biogenic                                                                                                         |
| COV                                             | VOC, volatile organic compounds as C                                                                                             |
| H <sub>2</sub> O                                | Water                                                                                                                            |
| K- emitted to soil                              | Potassium                                                                                                                        |
| NH <sub>3</sub>                                 | Ammonia, PT                                                                                                                      |
| NO <sub>x</sub>                                 | Nitrogen oxides, PT                                                                                                              |
| NO <sub>x</sub> , as NO <sub>2</sub>            | Nitrogen dioxide, PT                                                                                                             |
| NO <sub>3</sub> <sup>-</sup>                    | Nitrate                                                                                                                          |
| N <sub>2</sub> O                                | Dinitrogen monoxide                                                                                                              |
| NM VOC                                          | NM VOC, non-methane volatile organic compounds                                                                                   |
| Oxygen                                          | Oxygen                                                                                                                           |
| P- emitted to soil                              | Phosphorus, PT                                                                                                                   |
| TP                                              | Particulates, SPM                                                                                                                |
| Water                                           | Water, unspecified natural origin, PT                                                                                            |

Categories indicators results for the mulching, composting and energetic valorization.

**Table S3.** Characterisation of the LCIA results for mulching

| IC   | Unit                               | Tot       | P <sub>FRs</sub> | S <sub>AFRs</sub> | T <sub>M</sub> | T <sub>FRs</sub> | T <sub>ARs</sub> | RN       | Urea      | TSP       | KCl       |
|------|------------------------------------|-----------|------------------|-------------------|----------------|------------------|------------------|----------|-----------|-----------|-----------|
| AD   | kg Sb <sub>eq</sub>                | -2.51E-04 | 9.16E-06         | 1.28E-05          | 1.81E-06       | 1.33E-06         | 4.31E-07         | 0.00E+00 | -2.69E-04 | -9.32E-07 | -6.78E-06 |
| Adff | MJ                                 | -1.28E+02 | 1.33E+02         | 8.00E+01          | 4.55E+01       | 3.35E+01         | 1.08E+01         | 0.00E+00 | -4.25E+02 | -1.17E+00 | -4.60E+00 |
| GW   | kg CO <sub>2eq</sub>               | 2.33E+01  | 9.80E+00         | 5.77E+00          | 3.35E+00       | 2.46E+00         | 7.97E-01         | 1.93E+01 | -1.77E+01 | -8.01E-02 | -3.00E-01 |
| OLD  | kg CFC-11 <sub>eq</sub>            | 5.92E-07  | 1.68E-06         | 9.60E-07          | 5.66E-07       | 4.17E-07         | 1.35E-07         | 0.00E+00 | -3.11E-06 | -8.87E-09 | -4.46E-08 |
| HT   | kg 1,4-DB <sub>eq</sub>            | -9.72E+00 | 1.58E+00         | 1.64E+00          | 4.30E-01       | 3.16E-01         | 1.02E-01         | 8.52E-02 | -1.34E+01 | -1.26E-01 | -3.45E-01 |
| FE   | kg 1,4-DB <sub>eq</sub>            | -4.97E+00 | 1.34E+00         | 1.38E+00          | 3.44E-01       | 2.53E-01         | 8.20E-02         | 0.00E+00 | -8.13E+00 | -4.22E-02 | -2.00E-01 |
| ME   | kg 1,4-DB <sub>eq</sub>            | -8.99E+03 | 1.89E+03         | 2.06E+03          | 5.70E+02       | 4.20E+02         | 1.36E+02         | 0.00E+00 | -1.26E+04 | -1.15E+03 | -3.38E+02 |
| TE   | kg 1,4-DB <sub>eq</sub>            | 6.95E-02  | 8.76E-02         | 4.06E-03          | 1.35E-03       | 9.94E-04         | 3.22E-04         | 0.00E+00 | -2.37E-02 | -6.53E-04 | -5.53E-04 |
| PO   | kg C <sub>2</sub> H <sub>4eq</sub> | 1.45E-02  | 1.56E-02         | 9.21E-04          | 5.66E-04       | 4.17E-04         | 1.35E-04         | 0.00E+00 | -2.93E-03 | -2.05E-04 | -6.06E-05 |
| A    | kg SO <sub>2eq</sub>               | 8.07E-01  | 6.75E-02         | 1.53E-02          | 1.24E-02       | 9.13E-03         | 2.95E-03         | 7.73E-01 | -6.70E-02 | -5.08E-03 | -1.42E-03 |
| E    | kg PO <sub>4<sup>---</sup>eq</sub> | 6.86E-01  | 2.44E-02         | 3.51E-03          | 2.77E-03       | 2.04E-03         | 6.59E-04         | 6.69E-01 | -1.59E-02 | -4.86E-04 | -3.74E-04 |

**Table S4.** Characterisation of the LCIA results for composting

| IC          | Unit                                            | Tot           | C <sub>EC</sub> | P <sub>FRs</sub> | S <sub>AFRs</sub> | T <sub>FRs</sub> | T <sub>ARs</sub> | T <sub>C</sub> | Urea          | TSP           | KCl           |
|-------------|-------------------------------------------------|---------------|-----------------|------------------|-------------------|------------------|------------------|----------------|---------------|---------------|---------------|
| <b>AD</b>   | kg Sb <sub>eq</sub>                             | -2.54<br>E-04 | 0.00<br>E+00    | 9.16<br>E-06     | 1.28<br>E-05      | 1.33<br>E-06     | 4.31<br>E-07     | 1.13<br>E-06   | -1.86<br>E-04 | -2.47<br>E-05 | -6.81<br>E-05 |
| <b>ADff</b> | MJ                                              | -8.87E+01     | 0.00E+00        | 1.33E+02         | 8.00E+01          | 3.35E+01         | 1.08E+01         | 2.85E+01       | -2.97E+02     | -3.11E+01     | -4.61E+01     |
| <b>GW</b>   | kg CO <sub>2</sub> <sub>eq</sub>                | 1.80E+01      | 1.47E+01        | 9.80E+00         | 5.77E+00          | 2.46E+00         | 7.97E-01         | 2.10E+00       | -1.25E+01     | -2.12E+00     | -3.01E+00     |
| <b>OLD</b>  | kg CFC-11 <sub>eq</sub>                         | 6.70E-07      | 0.00E+00        | 1.68E-06         | 9.60E-07          | 4.17E-07         | 1.35E-07         | 3.55E-07       | -2.19E-06     | -2.35E-07     | -4.48E-07     |
| <b>HT</b>   | kg 1,4-DB <sub>eq</sub>                         | -1.22E+01     | 1.96E-03        | 1.58E+00         | 1.64E+00          | 3.16E-01         | 1.02E-01         | 2.69E-01       | -9.36E+00     | -3.33E+00     | -3.47E+00     |
| <b>FE</b>   | kg 1,4-DB <sub>eq</sub>                         | -5.52E+00     | 0.00E+00        | 1.34E+00         | 1.38E+00          | 2.53E-01         | 8.20E-02         | 2.16E-01       | -5.66E+00     | -1.12E+00     | -2.01E+00     |
| <b>ME</b>   | kg 1,4-DB <sub>eq</sub>                         | -3.77E+04     | 0.00E+00        | 1.89E+03         | 2.06E+03          | 4.20E+02         | 1.36E+02         | 3.57E+02       | -8.78E+03     | -3.04E+04     | -3.39E+03     |
| <b>TE</b>   | kg 1,4-DB <sub>eq</sub>                         | 5.43E-02      | 0.00E+00        | 8.76E-02         | 4.06E-03          | 9.94E-04         | 3.22E-04         | 8.46E-04       | -1.67E-02     | -1.73E-02     | -5.55E-03     |
| <b>PO</b>   | kg C <sub>2</sub> H <sub>4</sub> <sub>eq</sub>  | 9.64E-03      | 2.81E-04        | 1.56E-02         | 9.21E-04          | 4.17E-04         | 1.35E-04         | 3.55E-04       | -2.06E-03     | -5.42E-03     | -6.09E-04     |
| <b>A</b>    | kg SO <sub>2</sub> <sub>eq</sub>                | -6.22E-02     | 3.14E-02        | 6.75E-02         | 1.53E-02          | 9.13E-03         | 2.95E-03         | 7.77E-03       | -4.74E-02     | -1.35E-01     | -1.43E-02     |
| <b>E</b>    | kg PO <sub>4</sub> <sup>---</sup> <sub>eq</sub> | 2.50E-02      | 2.05E-02        | 2.44E-02         | 3.51E-03          | 2.04E-03         | 6.59E-04         | 1.74E-03       | -1.12E-02     | -1.29E-02     | -3.76E-03     |

**Table S5.** Characterisation of the LCIA results for energetic valorization

| IC   | Unit                               | Tot       | C <sub>RF</sub> | P <sub>FRs</sub> | S <sub>AFRs</sub> | T <sub>FRs</sub> | T <sub>ARs</sub> | T <sub>C</sub> | Urea      | TSP       | KCl       |
|------|------------------------------------|-----------|-----------------|------------------|-------------------|------------------|------------------|----------------|-----------|-----------|-----------|
| AD   | kg Sb <sub>eq</sub>                | -2.80E-04 | 0.00E+00        | 9.16E-06         | 1.28E-05          | 1.33E-06         | 4.31E-07         | 1.13E-06       | -2.07E-04 | -2.47E-05 | -7.30E-05 |
| ADff | MJ                                 | -1.23E+02 | 0.00E+00        | 1.33E+02         | 8.00E+01          | 3.35E+01         | 1.08E+01         | 2.85E+01       | -3.28E+02 | -3.11E+01 | -4.95E+01 |
| GW   | kg CO <sub>2eq</sub>               | 1.66E+01  | 1.47E+01        | 9.80E+00         | 5.77E+00          | 2.46E+00         | 7.97E-01         | 2.10E+00       | -1.37E+01 | -2.12E+00 | -3.23E+00 |
| OLD  | kg CFC-11 <sub>eq</sub>            | 4.31E-07  | 0.00E+00        | 1.68E-06         | 9.60E-07          | 4.17E-07         | 1.35E-07         | 3.55E-07       | -2.40E-06 | -2.35E-07 | -4.80E-07 |
| HT   | kg 1,4-DB <sub>eq</sub>            | -1.35E+01 | 1.96E-03        | 1.58E+00         | 1.64E+00          | 3.16E-01         | 1.02E-01         | 2.69E-01       | -1.03E+01 | -3.33E+00 | -3.72E+00 |
| FE   | kg 1,4-DB <sub>eq</sub>            | -6.27E+00 | 0.00E+00        | 1.34E+00         | 1.38E+00          | 2.53E-01         | 8.20E-02         | 2.16E-01       | -6.27E+00 | -1.12E+00 | -2.15E+00 |
| ME   | kg 1,4-DB <sub>eq</sub>            | -3.89E+04 | 0.00E+00        | 1.89E+03         | 2.06E+03          | 4.20E+02         | 1.36E+02         | 3.57E+02       | -9.70E+03 | -3.04E+04 | -3.64E+03 |
| TE   | kg 1,4-DB <sub>eq</sub>            | 5.23E-02  | 0.00E+00        | 8.76E-02         | 4.06E-03          | 9.94E-04         | 3.22E-04         | 8.46E-04       | -1.83E-02 | -1.73E-02 | -5.95E-03 |
| PO   | kg C <sub>2</sub> H <sub>4eq</sub> | 9.40E-03  | 2.81E-04        | 1.56E-02         | 9.21E-04          | 4.17E-04         | 1.35E-04         | 3.55E-04       | -2.26E-03 | -5.42E-03 | -6.53E-04 |
| A    | kg SO <sub>2eq</sub>               | -6.75E-02 | 3.14E-02        | 6.75E-02         | 1.53E-02          | 9.13E-03         | 2.95E-03         | 7.77E-03       | -5.16E-02 | -1.35E-01 | -1.53E-02 |
| E    | kg PO <sub>4<sup>---</sup>eq</sub> | 2.37E-02  | 2.05E-02        | 2.44E-02         | 3.51E-03          | 2.04E-03         | 6.59E-04         | 1.74E-03       | -1.23E-02 | -1.29E-02 | -4.03E-03 |
